# Supplementary material for: The beagle dog MicroRNA tissue atlas: identifying translatable biomarkers of organ toxicity
Source: PubMed Central journal article supplement (PMC4989286; doi:10.1186/s12864-016-2958-x), 2016-08-17
Supplement: 12864_2016_2958_MOESM3_ESM.pdf [file 12864_2016_2958_MOESM3_ESM.pdf]

# Supplemental Figure 2

| Top 20 Enriched | Tissue   | miRNA                                                     | med_over_max | Wilcox p-value | Median (RPM) |
|-----------------|----------|-----------------------------------------------------------|--------------|----------------|--------------|
| 1               | Testis   | cfa-miR-508b                                              | 581          | 2.41E-11       | 660          |
| 2               | Testis   | cfa-miR-202_hsa-miR-202-5p_rno-miR-202-5p                 | 420          | 3.30E-05       | 3340         |
| 3               | Brain    | cfa-miR-124_hsa-miR-124-3p_rno-miR-124-3p                 | 347          | 6.84E-05       | 2971         |
| 4               | Pancreas | cfa-miR-217_hsa-miR-217                                   | 295          | 4.50E-05       | 3543         |
| 5               | Pancreas | cfa-miR-216b_hsa-miR-216b-5p_rno-miR-216b-5p              | 275          | 6.53E-05       | 5507         |
| 6               | Testis   | cfa-miR-8831                                              | 260          | 2.54E-10       | 268          |
| 7               | Testis   | cfa-miR-8908b                                             | 222          | 2.83E-07       | 456          |
| 8               | Testis   | cfa-miR-508a                                              | 212          | 1.17E-10       | 153          |
| 9               | Testis   | cfa-miR-506                                               | 185          | 4.75E-64       | 1094         |
| 10              | Liver    | hsa-miR-122-3p_hsa-miR-3591-5p                            | 184          | 1.12E-05       | 838          |
| 11              | Liver    | cfa-miR-122_hsa-miR-122-5p_rno-miR-122-5p_hsa-miR-3591-3p | 183          | 9.07E-05       | 22008        |
| 12              | Testis   | cfa-miR-8908c                                             | 132          | 9.38E-09       | 271          |
| 13              | Brain    | cfa-miR-219-3p_hsa-miR-219b-5p_rno-miR-219b               | 101          | 7.43E-07       | 276          |
| 14              | Brain    | hsa-miR-9-3p_rno-miR-9a-3p_rno-miR-9b-5p                  | 97           | 3.81E-05       | 527          |
| 15              | Testis   | cfa-miR-507b                                              | 86           | 1.68E-06       | 101          |
| 16              | Pancreas | cfa-miR-216a_hsa-miR-216a-5p_rno-miR-216a-5p              | 81           | 7.43E-05       | 4143         |
| 17              | Pancreas | rno-miR-217-3p                                            | 77           | 4.71E-07       | 349          |
| 18              | Testis   | cfa-miR-449a_hsa-miR-449a_rno-miR-449a-5p                 | 73           | 1.07E-64       | 3159         |
| 19              | Testis   | cfa-miR-507a                                              | 69           | 2.25E-12       | 34           |
| 20              | Brain    | cfa-miR-9_hsa-miR-9-5p_rno-miR-9a-5p_rno-miR-9b-3p        | 61           | 1.03E-64       | 38121        |
