# Supplementary material for: The beagle dog MicroRNA tissue atlas: identifying translatable biomarkers of organ toxicity
Source: PubMed Central journal article supplement (PMC4989286; doi:10.1186/s12864-016-2958-x), 2016-08-17
Supplement: 12864_2016_2958_MOESM6_ESM.pdf [file 12864_2016_2958_MOESM6_ESM.pdf]

# Supplemental Figure 5

| Dog miRNA Name | Assay Name      | Assay ID*  | miRBase acc. # |
|----------------|-----------------|------------|----------------|
| cfa-miR-1      | hsa-miR-1       | 00385      | MI0018528      |
| cfa-miR-122    | hsa-miR-122     | 002245     | MI0000256      |
| cfa-miR-133a   | hsa-miR-133a    | 000458     | MI0000362      |
| cfa-miR-133b   | hsa-miR-133b    | 002247     | MI0000821      |
| cfa-miR-16     | hsa-miR-16      | 000391     | MI0000565      |
| cfa-miR-186    | hsa-miR-186     | 002285     | MI0000228      |
| cfa-miR-192    | hsa-miR-192     | 000491     | MI0000551      |
| cfa-miR-193a   | hsa-miR-193a-5p | 002281     | MI0005014      |
| cfa-miR-193b   | hsa-miR-193b*   | 002366     | MI0005484      |
| cfa-miR-200a   | hsa-miR-2013a*  | 001011     | MI0000554      |
| cfa-miR-206    | hsa-miR-206     | 000510     | MI0000249      |
| cfa-miR-208b   | hsa-miR-208b    | 002290     | MI0005552      |
| cfa-miR-21     | hsa-miR-21      | 000397     | MI0000569      |
| cfa-miR-212    | mmu-miR-212-5p  | 461768_mat | MI0000696      |
| cfa-miR-216a   | hsa-miR-216     | 000519     | MI0010344      |
| cfa-miR-216b   | hsa-miR-216b    | 002326     | MI0004126      |
| cfa-miR-29a    | hsa-miR-29a     | 002112     | MI0000576      |
| cfa-miR-34b    | bta-miR-34b     | 007904_mat | MI0004763      |
| cfa-miR-34c    | hsa-miR-34c     | 000428     | MI0000403      |
| cfa-miR-432    | hsa-miR-432     | 001026     | MI0009831      |
| cfa-miR-499    | mmu-miR-499     | 001352     | MI0004676      |
| cfa-miR-885    | hsa-miR-885-5p  | 002296     | MI0009904      |

\*Applied Biosystems  
Assay Name
